# Supplementary material for: Evaluation of Three Imaging Methods to Quantify Key Events in Pelvic Bone Metastasis
Source: MDPI journal article supplement (doi:10.3390/cancers16010214), 2024-01-02
Supplement: s1 [file s1]

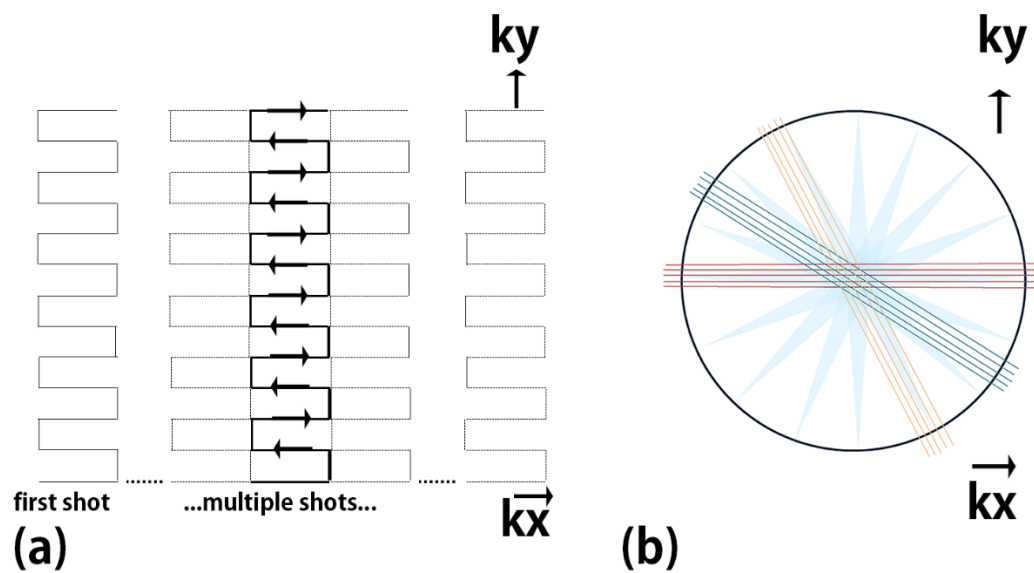

**Figure S1. K-space trajectory of RESOLVE DWI and BLADE DWI.** In RESOLVE DWI, the k-space trajectory is divided into multiple shots in the readout direction ( $k_x$ ), which allows for an encoding-time reduction increasing image quality. BLADE acquires every  $k$ -space line at the center of a spin echo, thus avoiding the phase accumulation that leads to distortion and blurring in EPI. The center of the  $k$ -space is covered in each train of refocusing pulses, and multiple rotated blades are acquired to fully sample a circular  $k$ -space region over multiple shot.
